# Supplementary material for: Response to the Letter to the Editor by Harris
Source: PubMed Central journal article supplement (PMC6480841; doi:10.1186/s13071-019-3439-2), 2019-04-24
Supplement: 13071_2019_3439_MOESM1_ESM.pdf [file 13071_2019_3439_MOESM1_ESM.pdf]

*Babesia lohae* (MG593272) GGC  
*Babesia orientalis* (HQ840969) AACCTGGTTGATCCTGCCAGTAGTCATATGCTTGTCTTAAAGATTAAGCCATGCATGTCTAAGTACAAGCTTTTACGGTGAAACTGCGAATGGC

*Babesia lohae* (MG593272) TCATTACAACAGTTATAGTTTCTTTGGTGGTTCGTTTCCATGGATAACCGTGCCTAATTGTAGGGCTAATAACAAGTTCGATGTTCTTGGACGGCGT  
*Babesia orientalis* (HQ840969) TCATTACAACAGTTATAGTTTATTTGGTATTCGTTTCCATGGATAACCGTGCCTAATTGTAGGGCTAATAACAAGTTCGATGCTTTGGCGGCGT

*Babesia lohae* (MG593272) TTATTAGCTTTTAAACCTCCTTTGGTTT-GGTGATTCATAATAAACTTGCGAATCGCCTGC-TTTGCGGCATGGTCCATTCAAGTTTCTGACCC  
*Babesia orientalis* (HQ840969) TTATTAGCTTTTAAACCTCCTCGTTTGGTTCGTTTCCATGGATAATAAACTTGCGAATCGCCTGCCTTTTGGCGGCATGGCCTTCAAGTTTCTGACCC

*Babesia lohae* (MG593272) ATCAGCTTGACGGTAGGGTATTGGCTACCGAGGCGCAACGGGTAAACGGGAAATTAGGGTTCGATTCCGGAGAGGGAGCCTGAGAAACGGCTAC  
*Babesia orientalis* (HQ840969) ATCAGCTTGACGGTAGGGTATTGGCTACCGAGGCGCAACGGGTAAACGGGAAATTAGGGTTCGATTCCGGAGAGGGAGCCTGAGAAACGGCTAC

*Babesia lohae* (MG593272) CACATCTAAGGAAGGCAGCGCGCAAAATACCAATCTGCACACAGGGAGGTAGTGACAAGAAATAACAATACAGGGCTACTGTCTTGAAT  
*Babesia orientalis* (HQ840969) CACATCTAAGGAAGGCAGCGCGCAAAATACCAATCTGCACACAGGGAGGTAGTGACAAGAAATAACAATACAGGGCTACTGTCTTGAAT

*Babesia lohae* (MG593272) TGGAAATGATGGTACTTAAACCTCACCAGAGTACCAATTTGGAGGGCAAGCTGGTG CAGCAGCCGGGTAATTTCCAGCTCCAATAGCGTATAT  
*Babesia orientalis* (HQ840969) TGGAAATGATGGTACTTAAACCTCACCAGAGTACCAATTTGGAGGGCAAGCTGGTGCCAGCAGCCGGTAATTTCCAGCTCCAATAGCGTATAT

*Babesia lohae* (MG593272) TAAACTTGTTCAGTTAAAAAGCTCGTAGTTGAATTTTCAGCATCGCGAGTTCGATTTCTTTGGTTCCTTCGCGTTGGCTTGGTTATTACTTT  
*Babesia orientalis* (HQ840969) TAAACTTGTTCAGTTAAAAAGCTCGTAGTTGAATTTTCAGCGTTTGGCTTGGTTCCTTCGCGTTGGCTTGGTTATTACTTT

*Babesia lohae* (MG593272) GAGAAAATTAGAGTGTTCACAGCAGCTTTTGTCTTGAATCTTCCGATGGAATAATAGAGTAGGACCTTGGTCTATTTTGTGGTTTTGTATA  
*Babesia orientalis* (HQ840969) GAGAAAATTAGAGTGTTCACAGCAGCTTTTGTCTTGAATCTTCCGATGGAATAATAGAGTAGGACCTTGGTCTATTTTGTGGTTTTGTATA

*Babesia lohae* (MG593272) CCTTGGTAATGGTTAATAGGAACGGTTGGGGCATTCTGATTTAACTGTGAGAGGTGAAATTCCTAGATTTGTTAAAGACGAACTACTGCGAAAG  
*Babesia orientalis* (HQ840969) CCTTGGTAATGGTTAATAGGAACGGTTGGGGCATTCTGATTTAACTGTGAGAGGTGAAATTCCTAGATTTGTTAAAGACGAACTACTGCGAAAG

*Babesia lohae* (MG593272) CATTTGCCAAGGACGTTTCCATTAACAAGAACGAAAGTTAGGGGATCGAAGACGATCAGATACCGTCTGATGCTTAACCAATAAATATGCCGAC  
*Babesia orientalis* (HQ840969) CATTTGCCAAGGACGTTTCCATTAACAAGAACGAAAGTTAGGGGATCGAAGACGATCAGATACCGTCTGATGCTTAACCAATAAATATGCCGAC

*Babesia lohae* (MG593272) TAGGGATTGGAGGTCGTCTATTTTCCGACTCCTTCAGCACCTTGAGAGAAATCAAAGTCTTTGGTCTGGGGGAGATGGTCCGCAAGCTCGAA  
*Babesia orientalis* (HQ840969) TAGGGATTGGAGGTCGTCTATTTTCCGACTCCTTCAGCACCTTGAGAGAAATCAAAGTCTTTGGTCTGGGGGAGATGGTCCGCAAGCTCGAA

*Babesia lohae* (MG593272) ACTTAAAGGAATTGACGGAAGGGCACCACAGGCGTGGAGCCTGCGGCTTAATTTGACTCAACACGGGAACTCACCAGTCCAGACAAAGTTA  
*Babesia orientalis* (HQ840969) ACTTAAAGGAATTGACGGAAGGGCACCACAGGCGTGGAGCCTGCGGCTTAATTTGACTCAACACGGGAACTCACCAGTCCAGACAAAGTTA

*Babesia lohae* (MG593272) GGATTGACAGATTGATGGTTCTTTCTTGTCTTTGGGTGGTGGTGCATGGCCGTTCTTAGTTGGTGGAGTGATTTGTCTGGTTAATTCGGTTAA  
*Babesia orientalis* (HQ840969) GGATTGACAGATTGATGGTTCTTTCTTGTCTTTGGGTGGTGGTGCATGGCCGTTCTTAGTTGGTGGAGTGATTTGTCTGGTTAATTCGGTTAA

*Babesia lohae* (MG593272) CGAACGAGACCTTAACTGCTATTTAGCTTTCGTTACTCGTTCGCTTAGCTTCTAGAGGGACTCTGCGGCTTCAAGTCGCAGGGAAGTTTAA  
*Babesia orientalis* (HQ840969) CGAACGAGACCTTAACTGCTATTTAGCTTTCGTTACTCGTTCGCTTAGCTTCTAGAGGGACTCTGCGGCTTCAAGTCGCAGGGAAGTTTAA

*Babesia lohae* (MG593272) GGCAATAACAGGTCGTGATGCCCTTAGATGTCCTGGGCTGCACGGCGCTACACTGATGCATGCATCGAGTTTACCCGCTCCGAAAGGCGCGG  
*Babesia orientalis* (HQ840969) GGCAATAACAGGTCGTGATGCCCTTAGATGTCCTGGGCTGCACGGCGCTACACTGATGCATGCATCGAGTTTACCCGCTCCGAAAGGCGCGG

*Babesia lohae* (MG593272) GTAATTCAGCAATCTGCATCGTGCCTGGGATGATTTTGAATTTAAATCATGAACGAGGAATGCCTAGTAGCGCAAGTCATCAGCTTGTGCA  
*Babesia orientalis* (HQ840969) GTAATTCAGCAATCTGCATCGTGCCTGGGATGATTTTGAATTTAAATCATGAACGAGGAATGCCTAGTAGCGCAAGTCATCAGCTTGTGCA

*Babesia lohae* (MG593272) GATT  
*Babesia orientalis* (HQ840969) GATTACGTCCTGCCCTTTGTACACACGCCCGTCTGCTTACCAGTTCGAGTGCATCGGTTGAATTTATTCGGACCGTGGCTTTTCCGATTCTGCAG

*Babesia lohae* (MG593272)  
*Babesia orientalis* (HQ840969) TTTTGCTAGGGAAGTTTTGTGAACCTTATCACTTAAAGGAAGGAGAAGTCTGTAACAAGTTTTCCGTAGGTGAACCTGCAGAAGGATC

**A**

*Babesia mackerrasorum* (MG593271) ATGGCTCATTACAACAGTTATAGTTTCTTTG  
*Babesia macropus* (JQ437265) CATATGCTTGTCTTAAAGATTAAGCCATGCATGTCTAAGTACAAGCTTTTACGGTGAAACTGCGAATGGCTCATTACAACAGTTATAGTTTCTTTG

*Babesia mackerrasorum* (MG593271) GTATTCTGTTTTCCATGGATAACCGTGCCTAATTGTAGGGCTAATAACAAGTTCGATGCTTTTGGCGGCTTTAATTAGCTTTTAAACCTGCTTTGGTTTT  
*Babesia macropus* (JQ437265) GTATTCTGTTTTCCATGGATAACCGTGCCTAATTGTAGGGCTAATAACAAGTTCGATGCTTTTGGCGGCTTTAATTAGCTTTTAAACCTGCTTTGGTTTT

*Babesia mackerrasorum* (MG593271) GGTGATTCATAATAAACTTGCGAATCGCATGCTTTTGGGGCGATGGCCCATCAAGTTCTGACCCATCAGCTTGCAGGTAGGGTATTGGCCCTACCG  
*Babesia macropus* (JQ437265) GGTGATTCATAATAAACTTGCGAATCGCATGCTTTTGGGGCGATGGCCCATCAAGTTCTGACCCATCAGCTTGCAGGTAGGGTATTGGCCCTACCG

*Babesia mackerrasorum* (MG593271) AGGCAGCAACGGGTAACGGGAAATAGGGTTCGATTCGGAGAGGGAGCCTGAGAAACGGCTACCACATCTAAGGAAGGCAGCAGGCGCGCAAAATTA  
*Babesia macropus* (JQ437265) AGGCAGCAACGGGTAACGGGAAATAGGGTTCGATTCGGAGAGGGAGCCTGAGAAACGGCTACCACATCTAAGGAAGGCAGCAGGCGCGCAAAATTA

*Babesia mackerrasorum* (MG593271) CCCAATCCTGACACAGGGAGGTAGTGACAAGAAATAACAATACAGGGCTACGGTCTTGAATTTGGAATGATGGTGAITTTAAACCTCACCAGAGTAC  
*Babesia macropus* (JQ437265) CCCAATCCTGACACAGGGAGGTAGTGACAAGAAATAACAATACAGGGCTACGGTCTTGAATTTGGAATGATGGTGAITTTAAACCTCACCAGAGTAC

*Babesia mackerrasorum* (MG593271) CAATTGGAGGGCAAACTGGTGGCCAGCAGCCGCGGTAATTCAGCTCCAATAGCGTATATTAACCTGTTGCAGTTAAAAAGCTCGTAGTTGAATTT  
*Babesia macropus* (JQ437265) CAATTGGAGGGCAAACTGGTGGCCAGCAGCCGCGGTAATTCAGCTCCAATAGCGTATATTAACCTGTTGCAGTTAAAAAGCTCGTAGTTGAATTT

*Babesia mackerrasorum* (MG593271) CAGCATTGCGTTTTGTTTCCATGATTTGGTTTTCTTCGCTTTGCTTATTTATTACTTTGAGAAAATTAGAGTGTTCGAAGCAGGCTTTTGTCTTGAA  
*Babesia macropus* (JQ437265) CAGCATTGCGTTTTGTTTCCATGATTTGGTTTTCTTCGCTTTGCTTATTTATTACTTTGAGAAAATTAGAGTGTTCGAAGCAGGCTTTTGTCTTGAA

*Babesia mackerrasorum* (MG593271) TACTTGGCATGGAATAATAGTAGTAGGACCTTGGTTTTATTTTGGTGGTTGGTTACTTTGGTAAATGTTAACTGGAACGTTGGGAACTTGCAT  
*Babesia macropus* (JQ437265) TACTTGGCATGGAATAATAGTAGTAGGACCTTGGTTTTATTTTGGTGGTTGGTTACTTTGGTAAATGTTAACTGGAACGTTGGGAACTTGCAT

*Babesia mackerrasorum* (MG593271) TTAACCTGCAGAGTGAATTTAGATTTGTTAAAGACGAACACTGCTGAAAACATTTGCCAAGGAGCTTTGATTATTCAGAACGAAAGTTAGG  
*Babesia macropus* (JQ437265) TTAACCTGCAGAGTGAATTTAGATTTGTTAAAGACGAACACTGCTGAAAACATTTGCCAAGGAGCTTTGATTATTCAGAACGAAAGTTAGG

*Babesia mackerrasorum* (MG593271) GGATCGAAGACGATCAGATACCGTCTGATGCTTAAACATAAACTAGCCGACTAGGGATTGGAGGTCTGCATTTTTCCGACTCCTTCAACACCTTGA  
*Babesia macropus* (JQ437265) GGATCGAAGACGATCAGATACCGTCTGATGCTTAAACATAAACTAGCCGACTAGGGATTGGAGGTCTGCATTTTTCCGACTCCTTCAACACCTTGA

*Babesia mackerrasorum* (MG593271) GAGAAATCAAAGTCTTTGGTTCTGGGGGAGTATGTTGCGAAGTCTGAAACTTAAAGGAAATGACGGAAGGGCACCACCAGGCGTGGAGCCTGCGG  
*Babesia macropus* (JQ437265) GAGAAATCAAAGTCTTTGGTTCTGGGGGAGTATGTTGCGAAGTCTGAAACTTAAAGGAAATGACGGAAGGGCACCACCAGGCGTGGAGCCTGCGG

*Babesia mackerrasorum* (MG593271) CTTAATTTGACTCAACACGGGAACTCACCAGTCCAGACAAAGTTAGGATGACAGATTGATAGCTCTTTCTTGATTTCTTTGGGTAGTGGTGCAT  
*Babesia macropus* (JQ437265) CTTAATTTGACTCAACACGGGAACTCACCAGTCCAGACAAAGTTAGGATGACAGATTGATAGCTCTTTCTTGATTTCTTTGGGTAGTGGTGCAT

*Babesia mackerrasorum* (MG593271) GGCCGTTCTTAGTTGGTGGAGTATTTGCTGTTTAACTTCGTTAAACGAAACGAGACCTTAACTGCTATTTAGCTTTCTGTTACTTTGGTTTCTGAT  
*Babesia macropus* (JQ437265) GGCCGTTCTTAGTTGGTGGAGTATTTGCTGTTTAACTTCGTTAAACGAAACGAGACCTTAACTGCTATTTAGCTTTCTGTTACTTTGGTTTCTGAT

*Babesia mackerrasorum* (MG593271) CTTCTTAGAGGGACTCTGCGGCTCAAGTCCGAGGGAAGTTAAAGGCAATAACAGGCTCTGTGATGCCCTTAGATGCTCTGGGCTGCACGCGCGCTAC  
*Babesia macropus* (JQ437265) CTTCTTAGAGGGACTCTGCGGCTCAAGTCCGAGGGAAGTTAAAGGCAATAACAGGCTCTGTGATGCCCTTAGATGCTCTGGGCTGCACGCGCGCTAC

*Babesia mackerrasorum* (MG593271) ACTAATGATGCATGCATGAGTTTATCTGCTCCGAAAGTGGGGTAACTACTAGTCTGCATCGTGTGGGGATTGATTTTTGCAATTTCAAATCATGA  
*Babesia macropus* (JQ437265) ACTAATGATGCATGCATGAGTTTATCTGCTCCGAAAGTGGGGTAACTACTAGTCTGCATCGTGTGGGGATTGATTTTTGCAATTTCAAATCATGA

*Babesia mackerrasorum* (MG593271) ACGAGGAATGCCTAGTATGCGCAAGTCACTAGCTTGTGCAAGTACGTCCTGCCCTTTGTACACACCGCCCGTCTGCTCCTACCGATCGAGTGCATC  
*Babesia macropus* (JQ437265) ACGAGGAATGCCTAGTATGCGCAAGTCACTAGCTTGTGCAAGTACGTCCTGCCCTTTGTACACACCGCCCGTCTGCTCCTACCGATCGAGTGCATC

*Babesia mackerrasorum* (MG593271)  
*Babesia macropus* (JQ437265) GGTGAATTTATTCGGACCGTGGCTTTTCCGATTCTGCTGGTTTTGCCTAGGGAAGTTTTGTGAACCTTATCACTTAAAGGAAG

**B**



1 10 20 30 40 50 60 70 80 90 100 110

*Theileria apogeana* (MG758116) CAGTAGTCATATGCTGTCTTAAAGATTAAAGCCATGCATGCTCTAAGTATAAACTTTTATATGGTGAACCTGCGAATGGCTCATTACAACAGTTATAGTTTATTTGATGTTCCGTT  
*Theileria bicornis* (AF499604) GTTATAGTTTATTTGATGTTCCGTT

120 130 140 150 160 170 180 190 200 210 220

*Theileria apogeana* (MG758116) ATTACATGGATAACCGTGCTAATTGTAGGGCTAATACATGTTCCGGGCTTCT-----GCCGCTTTATTAGACCTTAAACCTTCCCGCTTCCGGCGG-CCTTCCGGTGATTCA  
*Theileria bicornis* (AF499604) TTACATGGATAACCGTGCTAATTGTAGGGCTAATACATGTTCCGGGCTTCTAGCTCGCGTTTATTAGCTTAAACCTTCCCGCTTCCGGCGGTTTCCGGTGATTCA

230 240 250 260 270 280 290 300 310 320 330

*Theileria apogeana* (MG758116) TAATAAACTTGC GAATCGCATGGCTTCCGGCGGCGATGTATCATTCAAGTTTCTGACCTATCAGCTTTGGACGGTAGGGTATTGGCTACC GGGGCAACGACGGGTAAACGGG  
*Theileria bicornis* (AF499604) TAATAAACTTGC GAATCGCATGGCTTCCGGCGGCGATGTATCATTCAAGTTTCTGACCTATCAGCTTTGGACGGTAGGGTATTGGCTACC GGGGCAACGACGGGTAAACGGG

340 350 360 370 380 390 400 410 420 430 440 450

*Theileria apogeana* (MG758116) AATTGGGGTTCGATCCGGAGAGGGAGCCTGAGAAACGGCTACCACATCTAAGGAAGGCAGCAGGCGCGCAAATTACCAATCCTGACACAGGGAGGTAGTACAAAGAAATAA  
*Theileria bicornis* (AF499604) AATTGGGGTTCGATCCGGAGAGGGAGCCTGAGAAACGGCTACCACATCTAAGGAAGGCAGCAGGCGCGCAAATTACCAATCCTGACACAGGGAGGTAGTACAAAGAAATAA

460 470 480 490 500 510 520 530 540 550 560

*Theileria apogeana* (MG758116) CAATACGGGGCTCAATGTCTTGAATTTGGAATGATGGGAATCTAAACCCCTTCCAGAGTATCAATTTGAGGGCAAGTCTGGTGCCAGCAGCGCGGTAAATCCAGCTCCAATA  
*Theileria bicornis* (AF499604) CAATACGGGGCTCAATGTCTTGAATTTGGAATGATGGGAATCTAAACCCCTTCCAGAGTATCAATTTGAGGGCAAGTCTGGTGCCAGCAGCGCGGTAAATCCAGCTCCAATA

570 580 590 600 610 620 630 640 650 660 670

*Theileria apogeana* (MG758116) GCGTATATTTAAATTTGTTGTCAGTTAAAAAGCTCGTAGTTGAATTTTGGC-----CTCGCTTCCCTTCTCTTTTGGTTCCAGGTCGCGCTGGGACCTCTTCCGCTCTGGTTCC  
*Theileria bicornis* (AF499604) GCGTATATTTAAATTTGTTGTCAGTTAAAAAGCTCGTAGTTGAATTTTGGC-----CTCGCTTCCCTTCTCTTTTGGTTCCAGGTCGCGCTGGGACCTCTTCCGCTCTGGTTCC

680 690 700 710 720 730 740 750 760 770 780 790

*Theileria apogeana* (MG758116) CCGGCCCTTTTCTCCAGATTTTTACTTTGAGAAAATAGAGTCTTCAAGCAGGCTTTTGCCTTGAATACTTCAGCATGGAATAATAAAGTAGGACTTTGGTTCTAT-----TT  
*Theileria bicornis* (AF499604) CCGGCCCTTTTCTCCAGATTTTTACTTTGAGAAAATAGAGTCTTCAAGCAGGCTTTTGCCTTGAATACTTCAGCATGGAATAATAAAGTAGGACTTTGGTTCTAT-----TT

800 810 820 830 840 850 860 870 880 890 900

*Theileria apogeana* (MG758116) TGGTTGGTTTCCGGACCAAGTAAATGGTTAATAGGAACAGTTGGGGCATTCTGATTTAACTGTCAGAGGTGAAATCTTAGATTTGTTAAAGACGAAGTACTGCGAAAGCAT  
*Theileria bicornis* (AF499604) TGGTTGGTTTCCGGACCAAGTAAATGGTTAATAGGAACAGTTGGGGCATTCTGATTTAACTGTCAGAGGTGAAATCTTAGATTTGTTAAAGACGAAGTACTGCGAAAGCAT

910 920 930 940 950 960 970 980 990 1,000 1,010

*Theileria apogeana* (MG758116) TTGCCAAGGATGTTTTCAATTAACAAGAACGAAAGTTAGGGGATCGAAGACGATCAGATACCCTGCTAGTCCTAACCCATAAACTAGCCGACTAGAGATTGGAGGTCGTCAGT  
*Theileria bicornis* (AF499604) TTGCCAAGGATGTTTTCAATTAACAAGAACGAAAGTTAGGGGATCGAAGACGATCAGATACCCTGCTAGTCCTAACCCATAAACTAGCCGACTAGAGATTGGAGGTCGTCAGT

1,020 1,030 1,040 1,050 1,060 1,070 1,080 1,090 1,100 1,110 1,120 1,130

*Theileria apogeana* (MG758116) TTAACGACTCCTTCAGCACCTTGAGAGAAATCAAAGTCTTTGGGTTCTGGGGGAGTATGGTCGCAAGGCTGAAACTTAAAGGAATTCAGCGAAAGGACACCAGGCGTGG  
*Theileria bicornis* (AF499604) TTAACGACTCCTTCAGCACCTTGAGAGAAATCAAAGTCTTTGGGTTCTGGGGGAGTATGGTCGCAAGGCTGAAACTTAAAGGAATTCAGCGAAAGGACACCAGGCGTGG

1,140 1,150 1,160 1,170 1,180 1,190 1,200 1,210 1,220 1,230 1,240

*Theileria apogeana* (MG758116) AGCCTCGCGCTTAATTTGACTCAACACGGGAAAACCTACCAGGTCAGACAGAGGAAGGATTGACAGATTGATAGCTCTTTCTTGATTCCTTTGGTGGTGGTGCATGGCCGTT  
*Theileria bicornis* (AF499604) AGCCTCGCGCTTAATTTGACTCAACACGGGAAAACCTACCAGGTCAGACAGAGGAAGGATTGACAGATTGATAGCTCTTTCTTGATTCCTTTGGTGGTGGTGCATGGCCGTT

1,250 1,260 1,270 1,280 1,290 1,300 1,310 1,320 1,330 1,340 1,350

*Theileria apogeana* (MG758116) CTTAGTTGGTGGAGTATTTGCTGGTTAATCCGTTAACGAACGAGACCTTAACCTGCATAATAGGTTG-GGAGCAGGTCGCTCCAGCATCGCTCTCTAGAGGGA  
*Theileria bicornis* (AF499604) CTTAGTTGGTGGAGTATTTGCTGGTTAATCCGTTAACGAACGAGACCTTAACCTGCATAATAGGTTGAGAGATAAAGTTGGTTGCTCAATATCGCTCTCTAGAGGGA

1,360 1,370 1,380 1,390 1,400 1,410 1,420 1,430 1,440 1,450 1,460

*Theileria apogeana* (MG758116) CTTTGGCGTCATAAATCGCAAGGAAGTTAAGGCAATAACAGGCTGTGATGCCCTTAGATGCTCTGGGCTGCACGCGCGCTACACTGATGCATTCAGCGAGTTTACCCCTT  
*Theileria bicornis* (AF499604) CTTTGGCGTCATAAATCGCAAGGAAGTTAAGGCAATAACAGGCTGTGATGCCCTTAGATGCTCTGGGCTGCACGCGCGCTACACTGATGCATTCAGCGAGTTTACCCCTT

1,470 1,480 1,490 1,500 1,510 1,520 1,530 1,540 1,550 1,560 1,570 1,580

*Theileria apogeana* (MG758116) GCGCAAGAGCTTCAAGGTAATCTTAGTATGCATCGTCTGGGATTGACTATTGTAATATTAAGTCATGAACCTAGGAATGCCTAGTAGTGGCAAGTCATCAGCTGTAACCGACT  
*Theileria bicornis* (AF499604) GCGCAAGAGCTTCAAGGTAATCTTAGTATGCATCGTCTGGGATTGACTATTGTAATATTAAGTCATGAACCTAGGAATGCCTAGTAGTGGCAAGTCATCAGCTGTAACCGACT

1,590 1,600 1,610 1,620 1,630 1,640 1,650 1,660 1,670 1,680 1,690 1,694

*Theileria apogeana* (MG758116) AC  
*Theileria bicornis* (AF499604) AC

ACGTCCTGCCCTTTGTACACACCGCCCGTCAGCTCCTACCATCGAGTATCCGGTGAATTTATTCGGACCGTGAATTTCTATTTTTAGAAACGCTAGGGAAGTTTTG

E

1 10 20 30 40 50 60 70 80 90 100 110

*Theileria palmeri* (MG758113) CAGTAGTCATATGCTGTCTTAAAGATTAAAGCCATGCATGCTCTAAGTATAAACTTTTATATGGTGAACCTGCGAATGGCTCATTACAACAGTTATAGTTTATTTGATATTCGTTA  
*Theileria bicornis* (AF499604) GGTTCATTAAACAGTTATAGTTTATTTGATATTCGTTA

120 130 140 150 160 170 180 190 200 210 220

*Theileria palmeri* (MG758113) TTACATGGATAACCGTGCTAATTGTAGGGCTAATACATGTTCCGGGCTTCT-----GCCGCTTTATTAGACCTTAAACCTTCCCGCTTCCGGCGG-CCTTCCGGTGATTCA  
*Theileria bicornis* (AF499604) TTACATGGATAACCGTGCTAATTGTAGGGCTAATACATGTTCCGGGCTTCTAGCTCGCGTTTATTAGCTTAAACCTTCCCGCTTCCGGCGGTTTCCGGTGATTCA

230 240 250 260 270 280 290 300 310 320 330 340

*Theileria palmeri* (MG758113) CATAATAAACCCTTCCATGCTTATGGCTTTTGGCTACGATGATCATTCAAGTTTCTGACCTATCAGCTTTGGACGGTAGGGTATTGGCTACC GGGGCAACGACGGGTAACG  
*Theileria bicornis* (AF499604) CATAATAAACCCTTCCATGCTTATGGCTTTTGGCTACGATGATCATTCAAGTTTCTGACCTATCAGCTTTGGACGGTAGGGTATTGGCTACC GGGGCAACGACGGGTAACG

350 360 370 380 390 400 410 420 430 440 450

*Theileria palmeri* (MG758113) GGGAAATTAGGTTCCGATTCGGAGAGGGAGCCTGAGAAACGGCTACCACATCTAAGGAAGGCAGCAGGCGCGCAAATTACCAATCCTGACACAGGGAGGTAGTACAAAGAAAT  
*Theileria bicornis* (AF499604) GGGAAATTAGGTTCCGATTCGGAGAGGGAGCCTGAGAAACGGCTACCACATCTAAGGAAGGCAGCAGGCGCGCAAATTACCAATCCTGACACAGGGAGGTAGTACAAAGAAAT

460 470 480 490 500 510 520 530 540 550 560 570

*Theileria palmeri* (MG758113) AACAAATACGGGGCTTAATGTCTTGAATTTGGAATGATGGGAATCTAAACCCCTTCCAGAGTATCAATTTGAGGGCAAGTCTGGTGCCAGCAGCGCGGTAAATCCAGCTCCAAT  
*Theileria bicornis* (AF499604) AACAAATACGGGGCTTAATGTCTTGAATTTGGAATGATGGGAATCTAAACCCCTTCCAGAGTATCAATTTGAGGGCAAGTCTGGTGCCAGCAGCGCGGTAAATCCAGCTCCAAT

580 590 600 610 620 630 640 650 660 670 680

*Theileria palmeri* (MG758113) AGCGTATATTTAAATTTGTTGTCAGTTAAAAAGCTCGTAGTTGAATTTTGGTATAATCTTGTCCGTTTTTACGGTTTCTATGATGATAAACAACCTTCTTTGGTATTTCAAAC  
*Theileria bicornis* (AF499604) AGCGTATATTTAAATTTGTTGTCAGTTAAAAAGCTCGTAGTTGAATTTTGGTATAATCTTGTCCGTTTTTACGGTTTCTATGATGATAAACAACCTTCTTTGGTATTTCAAAC

690 700 710 720 730 740 750 760 770 780 790

*Theileria palmeri* (MG758113) TTCCGGTTGTTTATTTCCAAATTTTT-ACCTTTGAGAAAATAGAGTCTTCAAGCAGGCAATTTGCCTTGAATACTTCAGCATGGAATAATAAAGTAGGACTTTGGTTCTATTTTG  
*Theileria bicornis* (AF499604) TTCCGGTTGTTTATTTCCAAATTTTT-ACCTTTGAGAAAATAGAGTCTTCAAGCAGGCAATTTGCCTTGAATACTTCAGCATGGAATAATAAAGTAGGACTTTGGTTCTATTTTG

800 810 820 830 840 850 860 870 880 890 900 910

*Theileria palmeri* (MG758113) TTGGTT-----TTCCGACCAAAAGTAAATGGTTAATAGGAACAGTTGGGGCATTCTGATTTAACTGTCAGAGGTGAAATCTTAGATTTGTTAAAGACGAAGTACTGCGAAAGCA  
*Theileria bicornis* (AF499604) TTGGTTGGTTTCCGACCAAAAGTAAATGGTTAATAGGAACAGTTGGGGCATTCTGATTTAACTGTCAGAGGTGAAATCTTAGATTTGTTAAAGACGAAGTACTGCGAAAGCA

920 930 940 950 960 970 980 990 1,000 1,010 1,020

*Theileria palmeri* (MG758113) TTTGCCAAGGATGTTTTCAATTAACAAGAACGAAAGTTAGGGGATCGAAGACGATCAGATACCCTGCTAGTCCTAACCCATAAACTAGCCGACTAGAGATTGGAGGTCGTCAGT  
*Theileria bicornis* (AF499604) TTTGCCAAGGATGTTTTCAATTAACAAGAACGAAAGTTAGGGGATCGAAGACGATCAGATACCCTGCTAGTCCTAACCCATAAACTAGCCGACTAGAGATTGGAGGTCGTCAGT

1,030 1,040 1,050 1,060 1,070 1,080 1,090 1,100 1,110 1,120 1,130 1,140

*Theileria palmeri* (MG758113) TTAACGACTCCTTCAGCACCTTGAGAGAAATCAAAGTCTTTGGGTTCTGGGGGAGTATGGTCGCAAGGCTGAAACTTAAAGGAATTCAGCGAAAGGACACCAGGCGTGGGA  
*Theileria bicornis* (AF499604) TTAACGACTCCTTCAGCACCTTGAGAGAAATCAAAGTCTTTGGGTTCTGGGGGAGTATGGTCGCAAGGCTGAAACTTAAAGGAATTCAGCGAAAGGACACCAGGCGTGGGA

1,150 1,160 1,170 1,180 1,190 1,200 1,210 1,220 1,230 1,240 1,250

*Theileria palmeri* (MG758113) GCCTGCGGCTTAATTTGACTCAACACGGGAAAACCTACCAGGTCAGACAAAAGGAAGGATTGACAGATTGATAGCTCTTTCTGATTCCTTTGGTGGTGGTGCATGGCCGTTCT  
*Theileria bicornis* (AF499604) GCCTGCGGCTTAATTTGACTCAACACGGGAAAACCTACCAGGTCAGACAAAAGGAAGGATTGACAGATTGATAGCTCTTTCTGATTCCTTTGGTGGTGGTGCATGGCCGTTCT

1,260 1,270 1,280 1,290 1,300 1,310 1,320 1,330 1,340 1,350 1,360

*Theileria palmeri* (MG758113) TAGTTGGTGGAGTATTTGCTGGTTAATCCGTTAACGAACGAGACCTTAACCTGCTAAATAGGATTTGAGAATAAAGCTTTG-TTGTCTCAATATCCGCTCTTAGAGGGACT  
*Theileria bicornis* (AF499604) TAGTTGGTGGAGTATTTGCTGGTTAATCCGTTAACGAACGAGACCTTAACCTGCTAAATAGGATTTGAGAATAAAGCTTTG-TTGTCTCAATATCCGCTCTTAGAGGGACT

1,370 1,380 1,390 1,400 1,410 1,420 1,430 1,440 1,450 1,460 1,470 1,480

*Theileria palmeri* (MG758113) TTCCGGTCATAAATCGCAAGGAAGTTAAGGCAATAACAGGCTGTGATGCCCTTAGATGCTCCGGCTGCACGCGCGCTACACTGATGCATTCAGCGAGTTTATTCCTTTAC  
*Theileria bicornis* (AF499604) TTCCGGTCATAAATCGCAAGGAAGTTAAGGCAATAACAGGCTGTGATGCCCTTAGATGCTCCGGCTGCACGCGCGCTACACTGATGCATTCAGCGAGTTTATTCCTTTAC

1,490 1,500 1,510 1,520 1,530 1,540 1,550 1,560 1,570 1,580 1,590

*Theileria palmeri* (MG758113) CGAAGGCTTCAAGGTAATCTTTAATGATCGTCTGGGGATTGATTTGTAATCTTAATCATGAACCTAGGAATGCCTAGTAGTCCAGTCAAGTCAACGCTTGTACCGACT  
*Theileria bicornis* (AF499604) CGAAGGCTTCAAGGTAATCTTTAATGATCGTCTGGGGATTGATTTGTAATCTTAATCATGAACCTAGGAATGCCTAGTAGTCCAGTCAAGTCAACGCTTGTACCGACT

1,600 1,610 1,620 1,630 1,640 1,650 1,660 1,670 1,680 1,690 1,700 1,705

*Theileria palmeri* (MG758113) TCCCTGCCCTTTGTACACACCGCCCGTCAGCTCCTACCATCGAGTATCCGGTGAATTTATTCGGACCGTGAATTTCTATTTTTAGAAACGCTAGGGAAGTTTTG  
*Theileria bicornis* (AF499604) TCCCTGCCCTTTGTACACACCGCCCGTCAGCTCCTACCATCGAGTATCCGGTGAATTTATTCGGACCGTGAATTTCTATTTTTAGAAACGCTAGGGAAGTTTTG

F

*Theileria paparinii* (MG758115) AACCTGGTTGATCCTGCCAGTAGTCATATGCTTGTCTTAAAGACTAAGCCATGCATGTCTAAGTATAAGCTTTTATATGGTGAACCTGCGAATGGCTCATTAAACAGTTATAGTTTA  
*Theileria uilenbergi* (JF719835) AACCTGGTTGATCCTGCCAGTAGTCATATGCTTGTCTTAAAGACTAAGCCATGCATGTCTAAGTATAAGCTTTTATATGGTGAACCTGCGAATGGCTCATTAAACAGTTATAGTTTA

120 130 140 150 160 170 180 190 200 210 220 230

*Theileria paparinii* (MG758115) TTTGATGTTCTGTTTACATGGATAACCGTGTCAATTGTAGGGCTAATACATGTTCCGGGGCTTCC--GGCCGGCTTTATTAGACCTAAAACCTCCCGCTTGGGGCTTTCGGTGATT  
*Theileria uilenbergi* (JF719835) TTTGATGTTCTGTTTACATGGATAACCGTGTCAATTGTAGGGCTAATACATGTTCCGGGGCTTCC--GGCCGGCTTTATTAGACCTAAAACCTAAAACCGCTT--CCGGTGTCCGGTGATT

240 250 260 270 280 290 300 310 320 330 340 350

*Theileria paparinii* (MG758115) CATAATAAATCGCAATCGCATGGCTTCCGGTGGCAGTCAATCATTTCAAGTTTCTGACCTATCAGCTTTGGACGGTAGGGTATTGGCTACCAGGGCAACGACGGGTAACGGGAAT  
*Theileria uilenbergi* (JF719835) CATAATAAATCGCAATCGCA--GCTCCGGCC--GCAGTTCATCATTTCAAGTTTCTGACCTATCAGCTTTGGACGGTAGGGTATTGGCTACCAGGGCAACGACGGGTAACGGGAAT

360 370 380 390 400 410 420 430 440 450 460 470

*Theileria paparinii* (MG758115) TAGGGTTTCGATTCGGAGAGGGAGCCTGAGAAACGGCTACCACATCTAAGGAAGGCAGCAGCCGCGCAAAATACCCAATCCTGACACAGGGAGGTAGTGACAAGAAATAACAATACGG  
*Theileria uilenbergi* (JF719835) TAGGGTTTCGATTCGGAGAGGGAGCCTGAGAAACGGCTACCACATCTAAGGAAGGCAGCAGCCGCGCAAAATACCCAATCCTGACACAGGGAGGTAGTGACAAGAAATAACAATACGG

480 490 500 510 520 530 540 550 560 570 580 590

*Theileria paparinii* (MG758115) GGCTTAACTGCTTGTAAATGGAATGATGGGAATCTAAACCTCTCCAGAGTATCAATTTGGAGGGCAAGCTGGTCCAGCAGCCCGGTAATCCAGCTCCAATAGCGTATATTTAAA  
*Theileria uilenbergi* (JF719835) GGCTTAACTGCTTGTAAATGGAATGATGGGAATCTAAACCTCTCCAGAGTATCAATTTGGAGGGCAAGCTGGTCCAGCAGCCCGGTAATCCAGCTCCAATAGCGTATATTTAAA

600 610 620 630 640 650 660 670 680 690 700

*Theileria paparinii* (MG758115) TTGTTCAGTAAAAAGCTCGTAGTTGAATTTTTCACAGCCCTCCGGCCGCTTTCGGTTCGTTTGGAGGGCGGGCACTTTCTGGCAATTTGGGTTCCGGCCATTTTTCAG  
*Theileria uilenbergi* (JF719835) TTGTTCAGTAAAAAGCTCGTAGTTGAATTTTTCACAGCCCTCCGGCCGCTTTCGGTTCGTTTGGAGGGCGGGCACTTTCTGGCAATTTGGGTTCCGGCCATTTTTCAG

710 720 730 740 750 760 770 780 790 800 810 820

*Theileria paparinii* (MG758115) ATTTCTTACTTTGAGAAAAATGAGTGTTCACAGCAGCTTTTGCCTTGAATAGTTTCAGCATGGAATAATAGTAGGACTTTGGTCTATTTTGTGGTTTGGCGACCAAAGTAAT  
*Theileria uilenbergi* (JF719835) GT--GTTACTTTGAGAAAAATGAGTGTTCACAGCAGCTTTTGCCTTGAATAGTTTCAGCATGGAATAATAGTAGGACTTTGGTCTATTTTGTGGTTTGGCGACCAAAGTAAT

830 840 850 860 870 880 890 900 910 920 930 940

*Theileria paparinii* (MG758115) GGTTAATAGAACAGTTGGGGGCAATTCGTTAATCTGTCAGAGGTGAATTTCTTAGATTTGTTAAAGCAACTACTCGCAAAGCATTGCCAAGGATGTTTTCATTAATCAAGAAC  
*Theileria uilenbergi* (JF719835) GGTTAATAGAACAGTTGGGGGCAATTCGTTAATCTGTCAGAGGTGAATTTCTTAGATTTGTTAAAGCAACTACTCGCAAAGCATTGCCAAGGATGTTTTCATTAATCAAGAAC

950 960 970 980 990 1,000 1,010 1,020 1,030 1,040 1,050 1,060

*Theileria paparinii* (MG758115) GAAAGTTAGGGGATCGAAGACGATCAGATACCGTGTAGTCTTAAACATAAATATGCCGACTAGAGATTGGAGGTCGTCAGTTTAAACGACTCTTCAGCACCTGAGAGAATCAA  
*Theileria uilenbergi* (JF719835) GAAAGTTAGGGGATCGAAGACGATCAGATACCGTGTAGTCTTAAACATAAATATGCCGACTAGAGATTGGAGGTCGTCAGTTTAAACGACTCTTCAGCACCTGAGAGAATCAA

1,070 1,080 1,090 1,100 1,110 1,120 1,130 1,140 1,150 1,160 1,170 1,180

*Theileria paparinii* (MG758115) AGTCTTTGGGTTCTGGGGGAGTATGGTCGAAAGCTGAAACTTAAAGGAATGACGGAAAGGCACCACAGGCGTGGAGCCTGGCGCTAATTTGACTCAACACGGGGAACTACC  
*Theileria uilenbergi* (JF719835) AGTCTTTGGGTTCTGGGGGAGTATGGTCGAAAGCTGAAACTTAAAGGAATGACGGAAAGGCACCACAGGCGTGGAGCCTGGCGCTAATTTGACTCAACACGGGGAACTACC

1,190 1,200 1,210 1,220 1,230 1,240 1,250 1,260 1,270 1,280 1,290

*Theileria paparinii* (MG758115) AGGTCAGACAGGGAAGGATGACAGATTGATAGCTCTTTCTTGATTTCTTGGGGTGGTGCATGGCCGTTCTTAGTTGGTGGAGTATTGCTGGTTAATCCGTTAACGAAC  
*Theileria uilenbergi* (JF719835) AGGTCAGACAGGGAAGGATGACAGATTGATAGCTCTTTCTTGATTTCTTGGGGTGGTGCATGGCCGTTCTTAGTTGGTGGAGTATTGCTGGTTAATCCGTTAACGAAC

1,300 1,310 1,320 1,330 1,340 1,350 1,360 1,370 1,380 1,390 1,400 1,410

*Theileria paparinii* (MG758115) AGACCTTAACCTGCTAAATAGGGTCCGGGAGTAGTTCGGTCCGTCGTCGCTTTCAGAGGGACTTTGGCGTATAAAATCGCAAGGAAGTTAAAGGCAATAACAGGCTGTGAT  
*Theileria uilenbergi* (JF719835) AGACCTTAACCTGCTAAATAGGGTCCGGGAGTAGTTCGGTCCGTCGTCGCTTTCAGAGGGACTTTGGCGTATAAAATCGCAAGGAAGTTAAAGGCAATAACAGGCTGTGAT

1,420 1,430 1,440 1,450 1,460 1,470 1,480 1,490 1,500 1,510 1,520 1,530

*Theileria paparinii* (MG758115) GCCCTTAGATGTCCTGGGCTGCACGGCGCTACACTGATGCTTTCAGCGAGTTTATCCTTCCGCAAGGGCTTAGGTAATCTTTAGTATGCATCGTGTGGGGATTTGATTATTGAA  
*Theileria uilenbergi* (JF719835) GCCCTTAGATGTCCTGGGCTGCACGGCGCTACACTGATGCTTTCAGCGAGTTTATCCTTCCGCAAGGGCTTAGGTAATCTTTAGTATGCATCGTGTGGGGATTTGATTATTGAA

1,540 1,550 1,560 1,570 1,580 1,590 1,600 1,610 1,620 1,630 1,640 1,650

*Theileria paparinii* (MG758115) TTTCTAATCATGAACCTAGGAATGCCTAGTAGGTCGAAGTCATCAGCTTGTACCGACT  
*Theileria uilenbergi* (JF719835) TTTCTAATCATGAACCTAGGAATGCCTAGTAGGTCGAAGTCATCAGCTTGTACCGACT

1,660 1,670 1,680 1,690 1,700 1,710 1,720 1,730 1,740 1,750 1,760 1,766

*Theileria paparinii* (MG758115) ATTCCGACCGGGTCCCGTACGGGAACCCCTAGGGAAGTTTTGTGAACCTTACACTTAAAGGAAGGAGAAGTCTGAACAAAGGTTTCCGTAGGTGAACCTCGACAAGGATC  
*Theileria uilenbergi* (JF719835) ATTCCGACCGGGTCCCGTACGGGAACCCCTAGGGAAGTTTTGTGAACCTTACACTTAAAGGAAGGAGAAGTCTGAACAAAGGTTTCCGTAGGTGAACCTCGACAAGGATC

*Theileria worthingtonorum* (MG758114) CAGTAGTCATATGCTGTCTTAAAGACTAAGCCATGCATGTCTAAGTATAAACTTTTATATGGTGAACCTGCGAATGGCTCATTAAACAGTTATA  
*Theileria bicornis* (AF499604) CAGTAGTCATATGCTGTCTTAAAGACTAAGCCATGCATGTCTAAGTATAAACTTTTATATGGTGAACCTGCGAATGGCTCATTAAACAGTTATA

100 110 120 130 140 150 160 170 180 190

*Theileria worthingtonorum* (MG758114) GTTTATTTGATGTTCTGTTTACATGGATAACCGTGTCAATTGTAGGGCTAATACATGTTCCGGGGCTTCTTTTTT--GACCCGGTTTATTAGTCTT  
*Theileria bicornis* (AF499604) GTTTATTTGATGTTCTGTTTACATGGATAACCGTGTCAATTGTAGGGCTAATACATGTTCCGGGGCTTCTTTTTT--GACCCGGTTTATTAGTCTT

200 210 220 230 240 250 260 270 280

*Theileria worthingtonorum* (MG758114) AAAAACCCTCCCGTTTTTGGGTTTTTGGTGATTATAAATCGCAATCGCATGGCTTCCGGCTGGCGATGTATCATTAAGTTTCTGACCT  
*Theileria bicornis* (AF499604) AAAAACCCTCCCGTTTTTGGGTTTTTGGTGATTATAAATCGCAATCGCATGGCTTCCGGCTGGCGATGTATCATTAAGTTTCTGACCT

290 300 310 320 330 340 350 360 370 380

*Theileria worthingtonorum* (MG758114) ATCAGCTTTGGACGGTAGGGTATTGGCTACCGGGCAACGACGGTAACGGGAATTAGGGTTCGATCCGGAGAGGGAGCCTGAGAAACGGCT  
*Theileria bicornis* (AF499604) ATCAGCTTTGGACGGTAGGGTATTGGCTACCGGGCAACGACGGTAACGGGAATTAGGGTTCGATCCGGAGAGGGAGCCTGAGAAACGGCT

390 400 410 420 430 440 450 460 470

*Theileria worthingtonorum* (MG758114) ACCACATCTAAGGAAGGCAGCAGCCGCGCAAAATACCCAATCCTGACACAGGGAGGTAGTGACAAGAAATAACAAATACGGGGCTTAATGTCTTGT  
*Theileria bicornis* (AF499604) ACCACATCTAAGGAAGGCAGCAGCCGCGCAAAATACCCAATCCTGACACAGGGAGGTAGTGACAAGAAATAACAAATACGGGGCTTAATGTCTTGT

480 490 500 510 520 530 540 550 560 570

*Theileria worthingtonorum* (MG758114) AATTGGAATGATGGGAACCTAAACCCCTTCCAGAGTATCAATTGGAGGGCAAGTCTGGTCCAGCAGCCGGTAATTCAGCTCCAATAGCGTA  
*Theileria bicornis* (AF499604) AATTGGAATGATGGGAACCTAAACCCCTTCCAGAGTATCAATTGGAGGGCAAGTCTGGTCCAGCAGCCGGTAATTCAGCTCCAATAGCGTA

580 590 600 610 620 630 640 650 660

*Theileria worthingtonorum* (MG758114) TATTAAGGTTTGGTGCAGTTAAAAAGCTGTAGTTTAAATTTCTTGGCTTCCCTGCTCCGGCTTTCCGGCTTTGGT--GCGATGGCATTTCTCT  
*Theileria bicornis* (AF499604) TATTAAGGTTTGGTGCAGTTAAAAAGCTGTAGTTTAAATTTCTTGGCTTCCCTGCTCCGGCTTTCCGGCTTTGGT--GCGATGGCATTTCTCT

670 680 690 700 710 720 730 740 750

*Theileria worthingtonorum* (MG758114) GGTTCTTGGCTTTGGCCCTTTTCCAGATTTTACTTTGAGAAAATAGAGTGTTCGATCAGGCTTTTGCCTGAATACTTACAGTGGATGGA  
*Theileria bicornis* (AF499604) GGTTCTTGGCTTTGGCCCTTTTCCAGATTTTACTTTGAGAAAATAGAGTGTTCGATCAGGCTTTTGCCTGAATACTTACAGTGGATGGA

770 780 790 800 810 820 830 840 850

*Theileria worthingtonorum* (MG758114) ATAATAGAGTAGGACTTTGGTCTAT--TTTGGTGGTTTTGGGACCAAGTAATGGTTAATAGGAACAGTTGGGGGCAATTCGATTTAACTG  
*Theileria bicornis* (AF499604) ATAATAGAGTAGGACTTTGGTCTAT--TTTGGTGGTTTTGGGACCAAGTAATGGTTAATAGGAACAGTTGGGGGCAATTCGATTTAACTG

860 870 880 890 900 910 920 930 940 950

*Theileria worthingtonorum* (MG758114) TCAGAGGTGAAATCTTAGATTTGTTAAAGACGAACTACTGCGAAAGCATTGCCAAGGATGTTTCCATTAATCAAGAACGAAAGTTAGGGGATC  
*Theileria bicornis* (AF499604) TCAGAGGTGAAATCTTAGATTTGTTAAAGACGAACTACTGCGAAAGCATTGCCAAGGATGTTTCCATTAATCAAGAACGAAAGTTAGGGGATC

960 970 980 990 1,000 1,010 1,020 1,030 1,040

*Theileria worthingtonorum* (MG758114) GAAGACGATCAGATACCGTCTGATGCTTAAACATAAATATGCCGACTAGAGATTGGAGTCTGCACTTTTACAGACTCTTCAGCACCTGAGAG  
*Theileria bicornis* (AF499604) GAAGACGATCAGATACCGTCTGATGCTTAAACATAAATATGCCGACTAGAGATTGGAGTCTGCACTTTTACAGACTCTTCAGCACCTGAGAG

1,050 1,060 1,070 1,080 1,090 1,100 1,110 1,120 1,130 1,140

*Theileria worthingtonorum* (MG758114) GAAATCAAAGTCTTTGGTCTCGGGGGAGTAGGTCGCAAGGCTGAAACTTAAAGGAATGACGGAAGGGCACCACAGGCGTGGAGCCTGCGG  
*Theileria bicornis* (AF499604) GAAATCAAAGTCTTTGGTCTCGGGGGAGTAGGTCGCAAGGCTGAAACTTAAAGGAATGACGGAAGGGCACCACAGGCGTGGAGCCTGCGG

1,150 1,160 1,170 1,180 1,190 1,200 1,210 1,220 1,230

*Theileria worthingtonorum* (MG758114) CTTAATTTGACTCAACACGGGAAACTCACCAGTCCAGACAGAGGAAGGATTGACAGATTGATAGCTCTTTCTTGATTTCTTTGGTGGTGGTGC  
*Theileria bicornis* (AF499604) CTTAATTTGACTCAACACGGGAAACTCACCAGTCCAGACAGAGGAAGGATTGACAGATTGATAGCTCTTTCTTGATTTCTTTGGTGGTGGTGC

1,240 1,250 1,260 1,270 1,280 1,290 1,300 1,310 1,320 1,330

*Theileria worthingtonorum* (MG758114) ATGGCCGTTCTTAGTTGGTGGAGTATTGTCTGGTTAATCCGTTAACGAACGAGACCTTAACCTGCTAAATAGGCTCGAGAGGCTTATG  
*Theileria bicornis* (AF499604) ATGGCCGTTCTTAGTTGGTGGAGTATTGTCTGGTTAATCCGTTAACGAACGAGACCTTAACCTGCTAAATAGGCTCGAGAGGCTTATG

1,340 1,350 1,360 1,370 1,380 1,390 1,400 1,410 1,420

*Theileria worthingtonorum* (MG758114) GCTGTCTCAGTACTGCTTCTAGAGGACTTTCGGGCTATAAATCGCAAGGAAATTAAGGCAATAACAGGCTGTGATGCCCTAGATGCTCGT  
*Theileria bicornis* (AF499604) GCTGTCTCAGTACTGCTTCTAGAGGACTTTCGGGCTATAAATCGCAAGGAAATTAAGGCAATAACAGGCTGTGATGCCCTAGATGCTCGT

1,430 1,440 1,450 1,460 1,470 1,480 1,490 1,500 1,510 1,520

*Theileria worthingtonorum* (MG758114) GGCTGCACGGCGCTACACTGATGCATTCAGAGTTTAACTTCCCTTACCGACAGGATAGGTAATCTTTAGTATGCATCGTGGGGATTGATTA  
*Theileria bicornis* (AF499604) GGCTGCACGGCGCTACACTGATGCATTCAGAGTTTAACTTCCCTTACCGACAGGATAGGTAATCTTTAGTATGCATCGTGGGGATTGATTA

1,530 1,540 1,550 1,560 1,570 1,580 1,590 1,600 1,610

*Theileria worthingtonorum* (MG758114) TTGTAATCTTAATCATGAACCTAGGAATGCTTAGTAGGTCGAGTCAATCAGCTTGTACCGACT  
*Theileria bicornis* (AF499604) TTGTAATCTTAATCATGAACCTAGGAATGCTTAGTAGGTCGAGTCAATCAGCTTGTACCGACT

1,620 1,630 1,640 1,650 1,660 1,670 1,680 1,690 1,695

*Theileria worthingtonorum* (MG758114) AGCTCCTACCGATCGAGTACCGGTGAATTTTCGGACCGTGTGTTCTATTTTAAAGAACTCAGGGAAGTTTTG  
*Theileria bicornis* (AF499604) AGCTCCTACCGATCGAGTACCGGTGAATTTTCGGACCGTGTGTTCTATTTTAAAGAACTCAGGGAAGTTTTG
